# Supplementary material for: A GPR174–CCL21 module imparts sexual dimorphism to humoral immunity
Source: Springer Nature journal article supplement (doi:10.1038/s41586-019-1873-0), 2019-12-25
Supplement: 41586_2019_1873_MOESM1_ESM.pdf [file 41586_2019_1873_MOESM1_ESM.pdf]

---

**Supplementary information**

---

**A GPR174–CCL21 module imparts sexual dimorphism to humoral immunity**

---

In the format provided by the authors and unedited

Ruozhu Zhao, Xin Chen, Weiwei Ma, Jinyu Zhang, Jie Guo, Xiu Zhong, Jiacheng Yao, Jiahui Sun, Julian Rubinfien, Xuyu Zhou, Jianbin Wang & Hai Qi

## Supplementary Figure 1. Uncropped gel scans with size marker indications.

### Figure 3a



### Figure 3b



### Extended Data Figure 5I
